# Supplementary material for: How well are hazards associated with derechos reproduced in regional climate simulations?
Source: Copernicus journal article supplement (doi:10.5194/nhess-2021-373), 2021-12-10
Supplement: Supplementary file 1 [file nhess-2021-373-supplement-version2.pdf]

1 Supplemental Materials

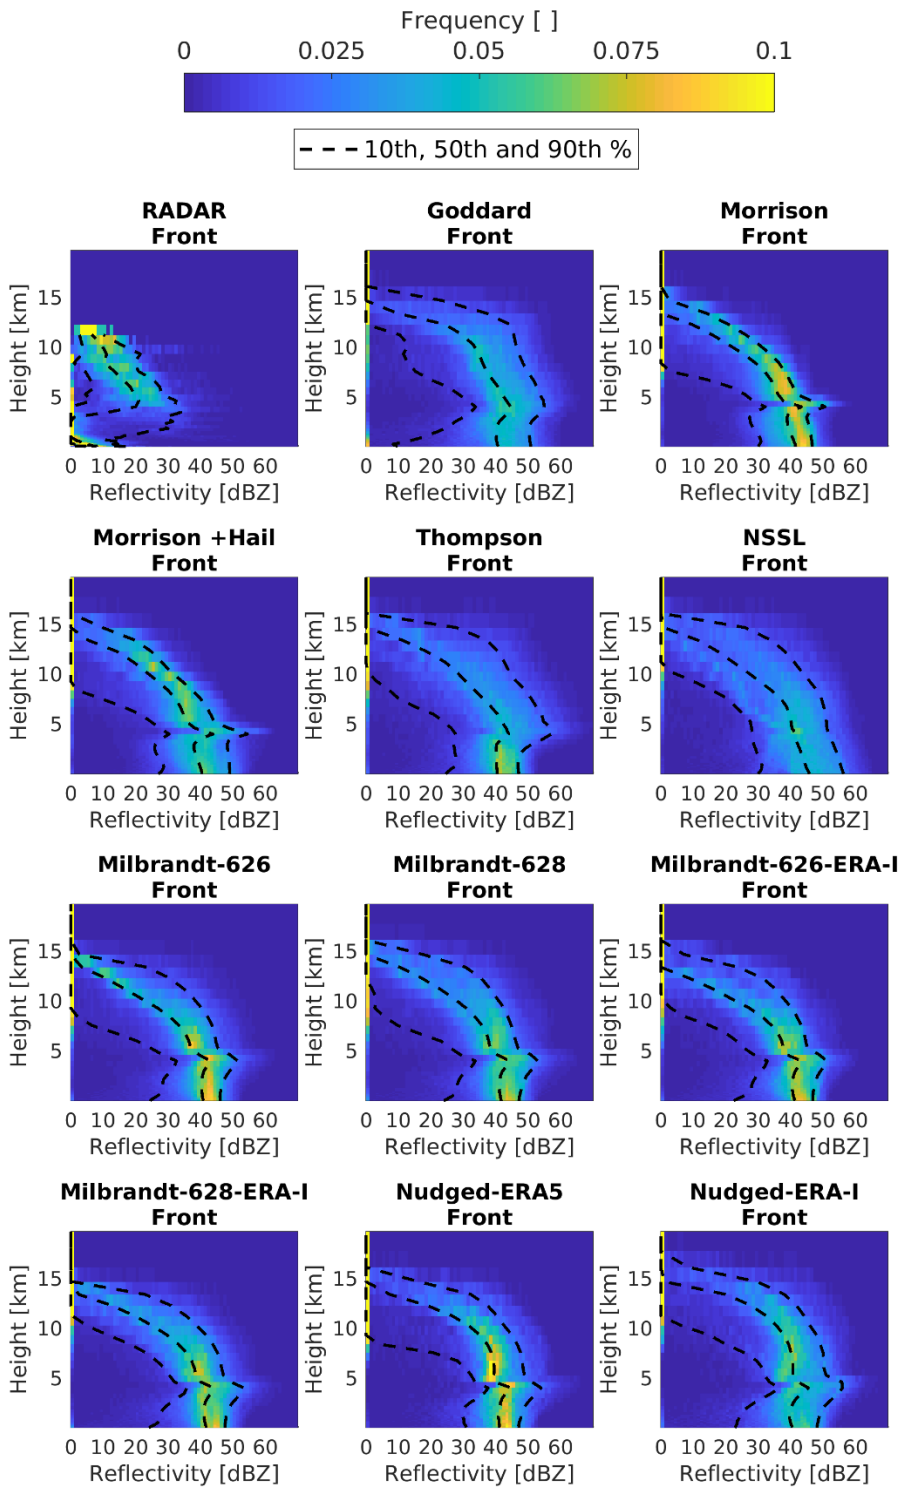

2

3 Figure S1: Probability distributions of base reflectivity from RADAR and derived RADAR reflectivity from each WRF  
 4 ensemble member at each model height at  $t_p$  during the Front period. The plot shows the frequency with which a given  
 5 reflectivity is observed at a given height in output for all domain d03 grid cells where  $cREF > 40$  dBZ. Dotted lines show  
 6 the 10<sup>th</sup>, 50<sup>th</sup> and 90<sup>th</sup> percentile reflectivity at each height.

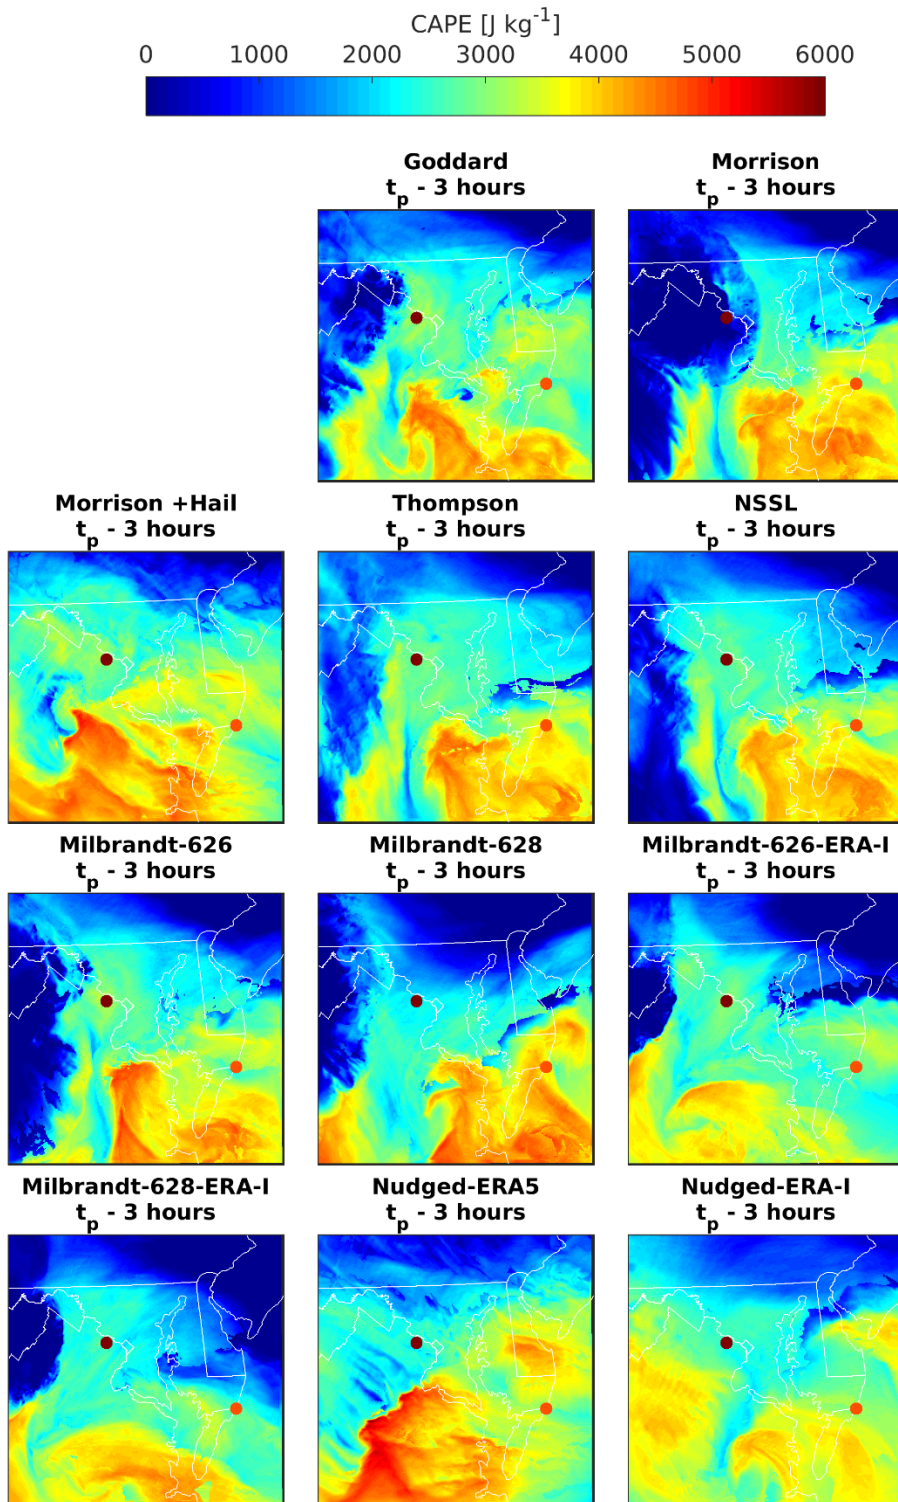

7

8 Figure S2: Spatial patterns of MU-CAPE at  $t_p-3$  (i.e. 3 hours prior to the time of peak spatial extent of cREF > 40 dBZ  
 9 during the Derecho period) over domain d03 for all ensemble members. These panels are also shown in Figure 15 of the  
 10 main text but are included again here, enlarged for visibility. MU-CAPE as computed from the SHARPPy program based  
 11 on rawinsonde data at  $t_p-3$  (define from RADAR) (i.e. 0000 UTC 30 June) at KIAD (38.968N, -77.369E) and KWAL  
 12 (38.018N and -75.236E) are shown by the filled circles.

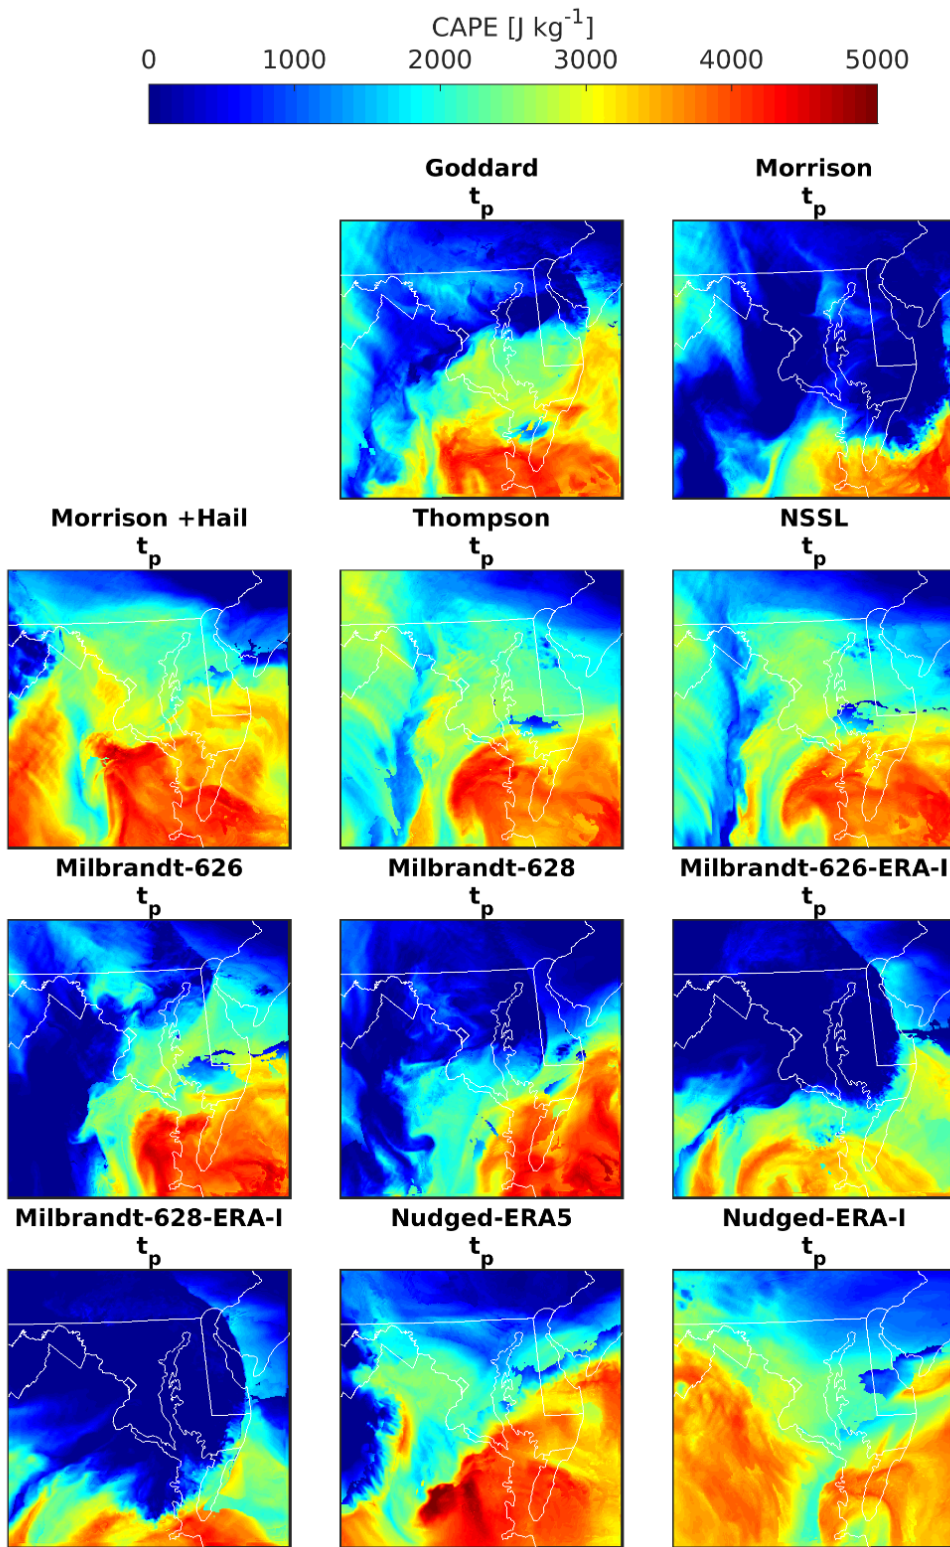

13

14 **Figure S3: Spatial patterns of MU-CAPE at  $t_p$  (i.e. the time of peak spatial extent of cREF > 40 dBZ during the Derecho**  
 15 **period) over domain d03 for all ensemble members. These panels are also shown in Figure 15 of the main text but are**  
 16 **included again here, enlarged for visibility.**

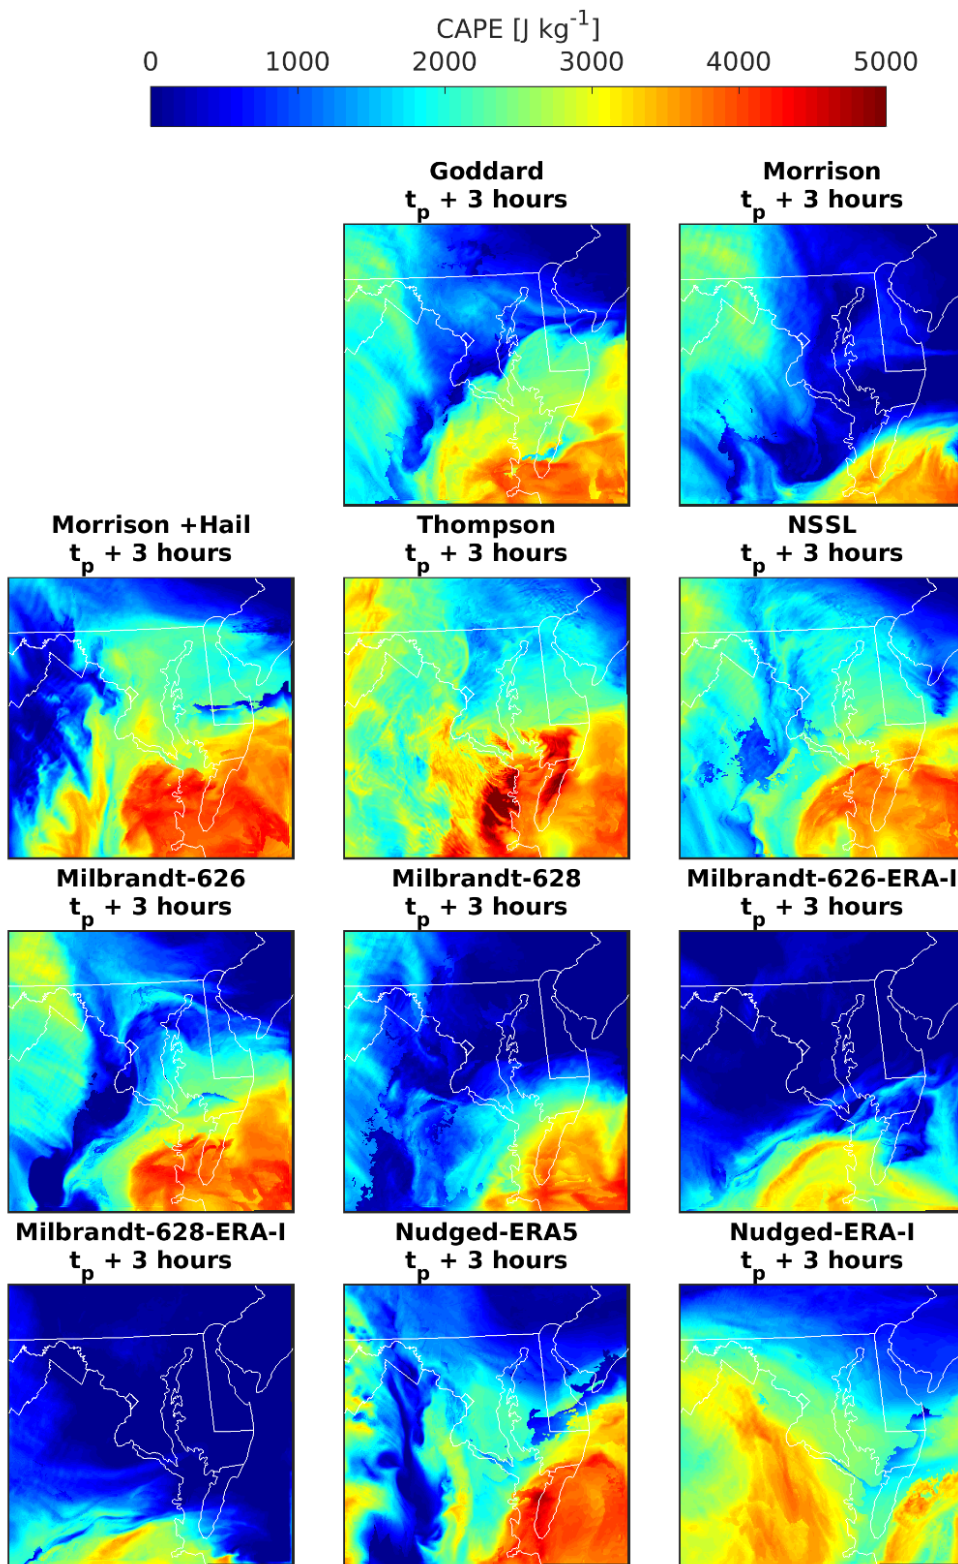

17

18 **Figure S4: Spatial pattern of MU-CAPE at  $t_p + 3$  hours (i.e. 3 hours after the time of peak spatial extent of cREF > 40 dBZ**  
 19 **during the Derecho period) over domain d03 for all ensemble members. These panels are also shown in Figure 15 of the**  
 20 **main text but are included again here, enlarged for visibility.**

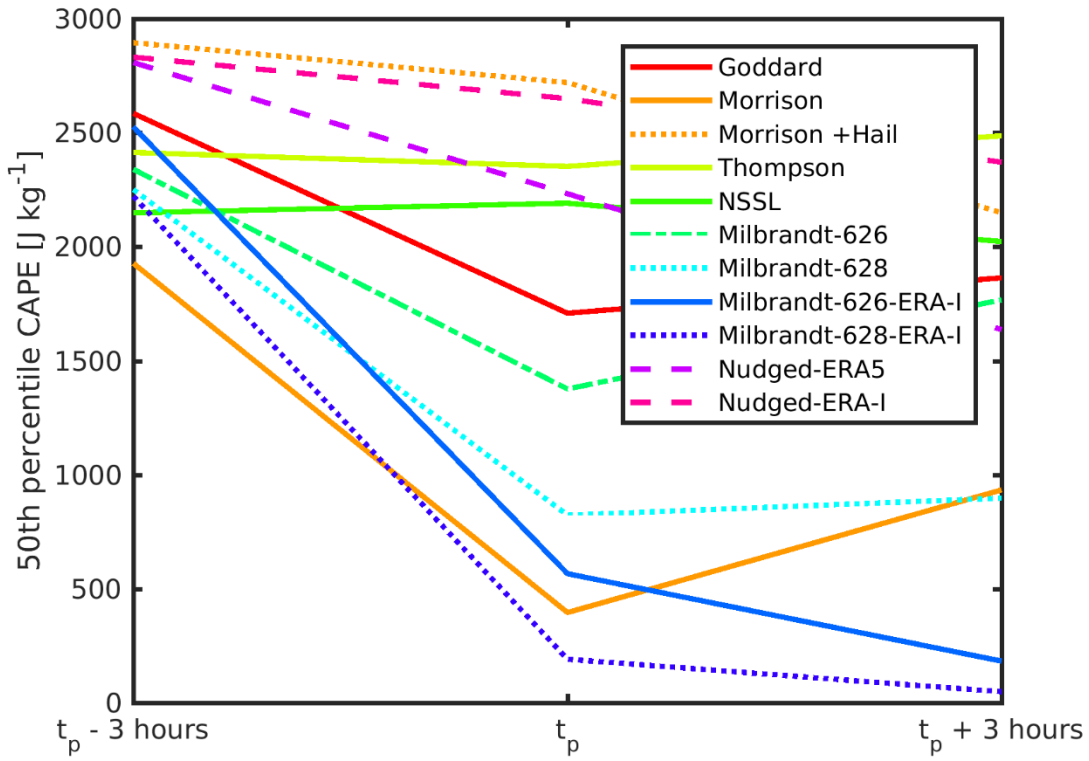

21

22 **Figure S5: The spatial average (median) MU-CAPE in domain d03 cells in the six hours surrounding  $t_p$  (the time of peak**  
 23 **spatial extent of cREF > 40 dBZ during the Derecho period) for each ensemble member.**

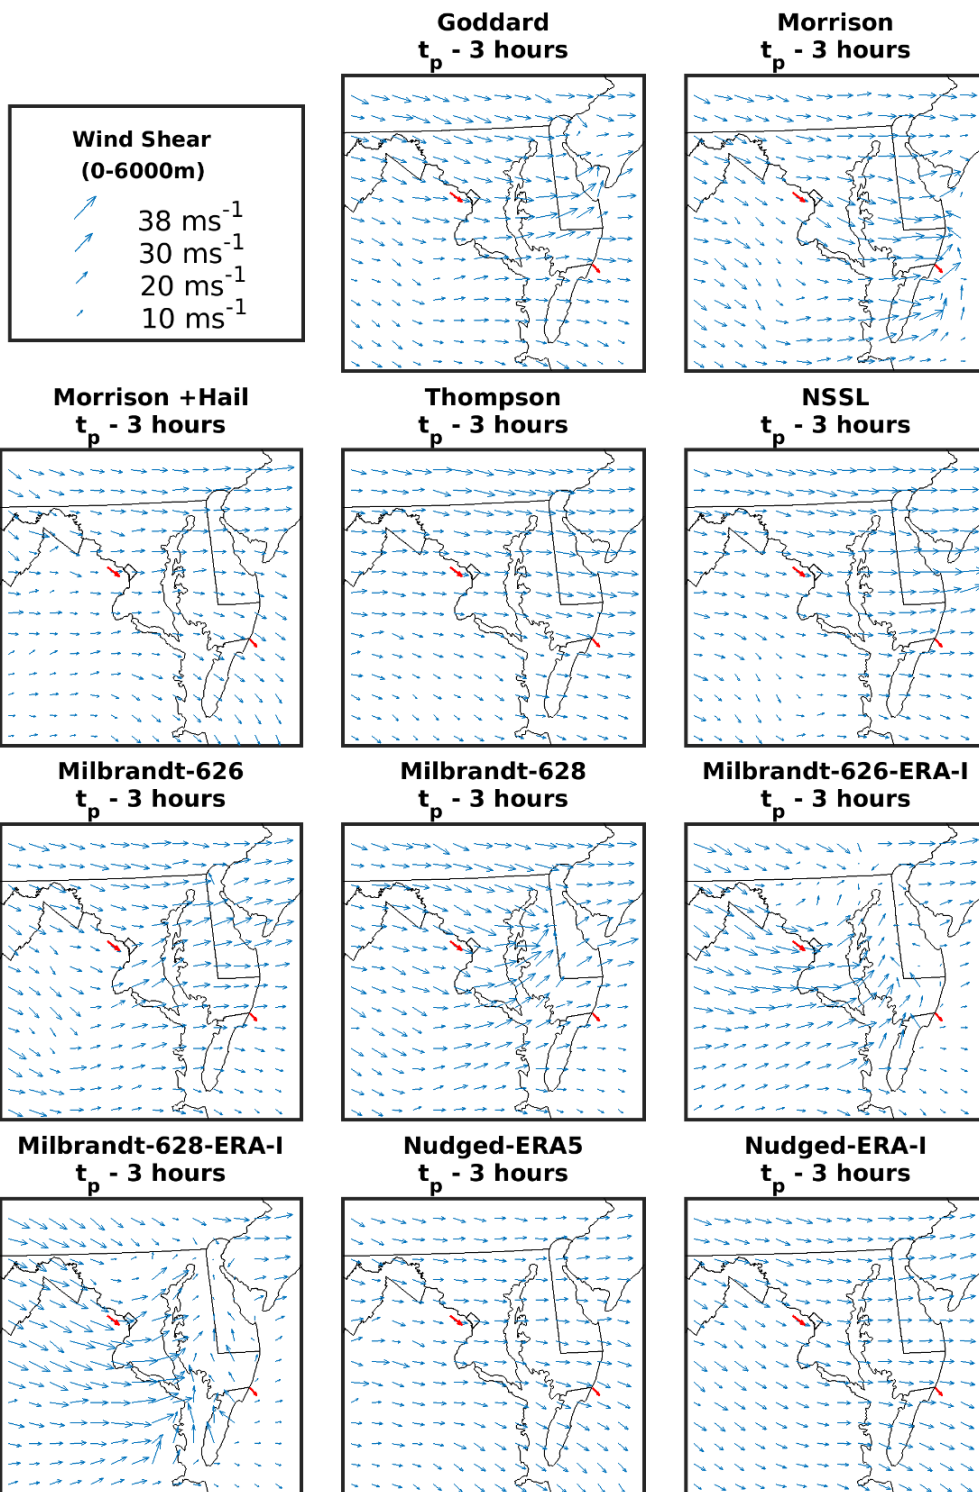

24

25 Figure S6: Total wind shear between the ground and 6000 m ( $S_6$ ) at  $t_p$  (the time of peak spatial extent of cREF > 40 dBZ  
 26 during the Derecho period) for each ensemble member. These panels are also shown in Figure 15 of the main text but are  
 27 included again here, enlarged for visibility. Observed shear from the surface to 6 km at the KIAD (38.968N, -77.369E) and  
 28 KWAL (38.018N and -75.236E) stations are shown by the red arrows.

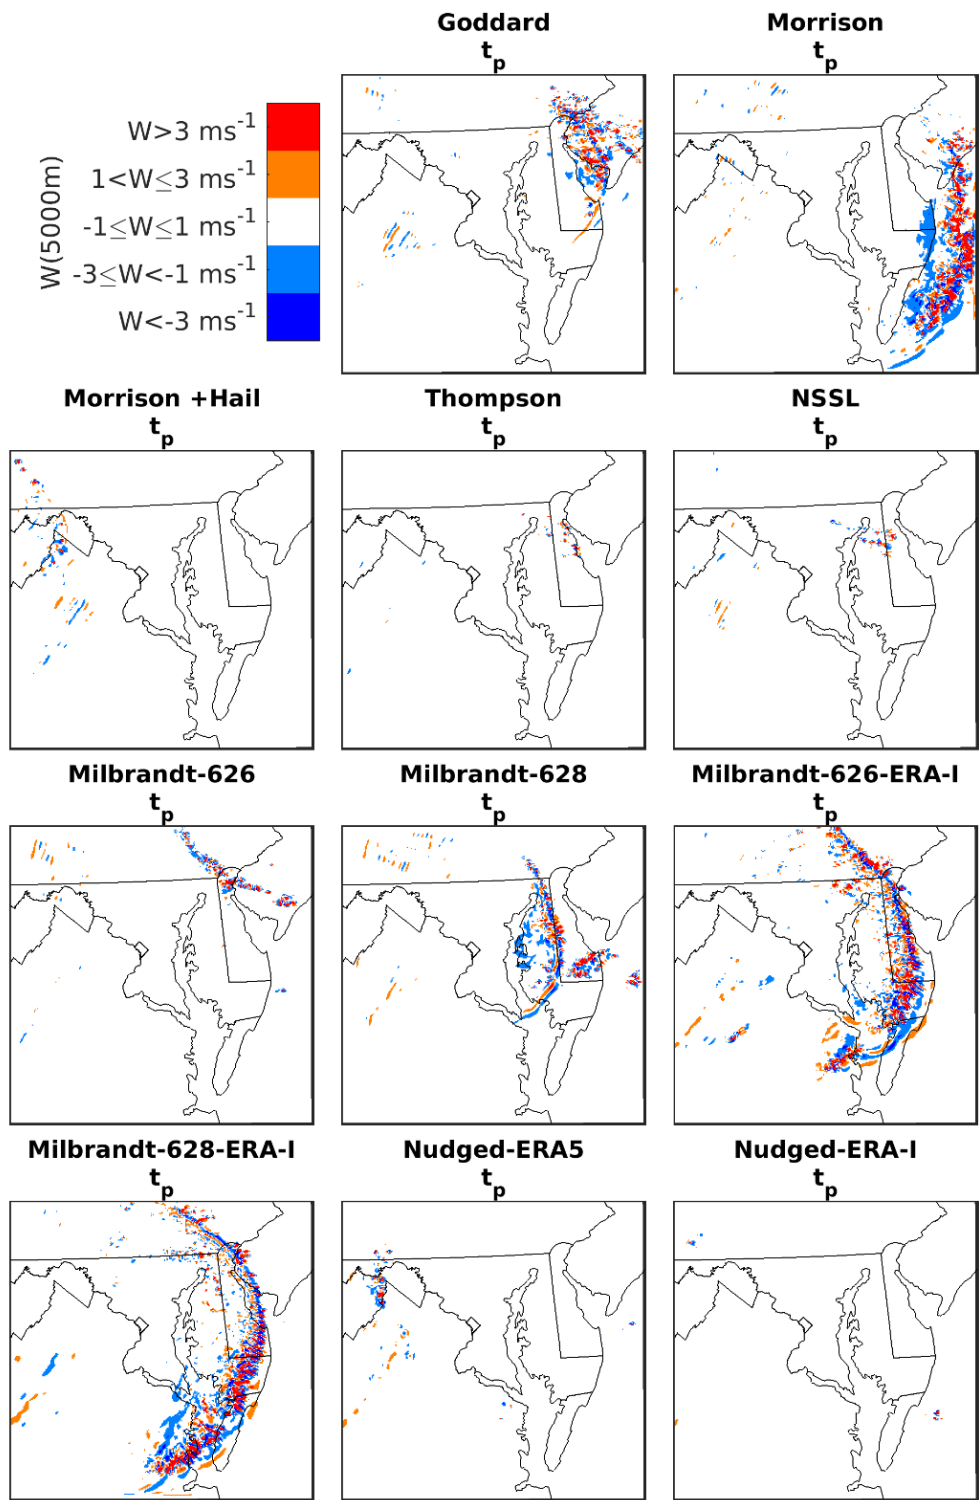

29

30 Figure S7: Vertical velocity ( $W$ ) at 5000 m and  $t_p$  (the time of peak spatial extent of cREF > 40 dBZ during the Derecho  
 31 period) for each ensemble member.  $|W| > 1 \text{ ms}^{-1}$  are shown in four colored classes. These vertical velocities are also shown  
 32 in Figure 15 of the main text but are included again here, enlarged for visibility.

```

33 Example namelist for the derecho simulations
34
35 &time_control
36   run_days           = 6,
37   run_hours          = 0,
38   run_minutes        = 0,
39   run_seconds        = 0,
40   start_year         = 2012, 2012, 2012,
41   start_month        = 06, 06, 06,
42   start_day          = 26, 26, 26,
43   start_hour         = 00, 00, 00,
44   start_minute       = 00, 00, 00,
45   start_second       = 00, 00, 00,
46   end_year           = 2012, 2012, 2012,
47   end_month          = 07, 07, 07,
48   end_day            = 02, 02, 02,
49   end_hour           = 00, 00, 00,
50   end_minute         = 00, 00, 00,
51   end_second         = 00, 00, 00,
52   interval_seconds   = 21600
53   input_from_file    = .true.,.true.,.true.,
54   history_interval   = 60, 10, 10,
55   frames_per_outfile = 1, 1, 1,
56   history_outname    = "/wrfout/wrfout_d<domain>_<date>"
57   restart            = .false.,
58   restart_interval   = 1440,
59   override_restart_timers = .true.,
60   io_form_history    = 11
61   io_form_restart    = 2
62   io_form_input      = 2
63   io_form_boundary   = 11
64   io_form_auxinput2  = 11
65   io_form_auxhist2   = 11
66   debug_level        = 10
67   nocolons           = .true.,
68   auxinput4_inname   = "wrflowinp_d<domain>",
69   auxinput4_interval = 1440, 1440, 1440,
70   io_form_auxinput4  = 2,
71   auxinput1_inname   =
72   "/met_files/ERA5/met_em.d<domain>.<date>"
73   iofields_filename  = "my_file_d01.txt",
74   "my_file_d02.txt", "my_file_d03.txt",
75   ignore_iofields_warning = .true.,
76   auxhist1_outname   = "/aux1/auxhist1_d<domain>_<date>"
77   auxhist1_interval  = 60, 60, 60,
78   frames_per_auxhist1 = 1, 1, 1,
79   io_form_auxhist1   = 11,
80   output_diagnostics = 1,
81   auxhist3_outname   = "/wrfout/wrfxtrm_d<domain>_<date>"
82   auxhist3_interval  = 60, 10, 10,
83   frames_per_auxhist3 = 1, 1, 1,

```



```

84   io_form_auxhist3           = 11,
85   /
86
87   &domains
88   time_step                   = 30,
89   time_step_fract_num        = 0,
90   time_step_fract_den        = 1,
91   max_dom                     = 3,
92   e_we                        = 175,    262,    295,
93   e_sn                        = 175,    262,    295,
94   e_vert                      = 41,     41,     41,
95   p_top_requested             = 5000,
96   sfcp_to_sfcp               = .true.,
97   num_metgrid_levels          = 38,
98   num_metgrid_soil_levels     = 4,
99   dx                          = 12000, 4000, 1333.33,
100  dy                          = 12000, 4000, 1333.33,
101  grid_id                     = 1,     2,     3,
102  parent_id                   = 1,     1,     2,
103  i_parent_start              = 1,     60,    105,
104  j_parent_start              = 1,     35,    75,
105  parent_grid_ratio           = 1,     3,     3,
106  parent_time_step_ratio      = 1,     3,     3,
107  feedback                    = 0,
108  max_ts_locs                 = 0,
109  eta_levels                   = 1.0000 , 0.9958 , 0.9916 , 0.9874
110  , 0.9832 ,
111                               0.9790 , 0.9749 , 0.9707 , 0.9661
112  , 0.9609 ,
113                               0.9549 , 0.9480 , 0.9398 , 0.9303
114  , 0.9189 ,
115                               0.9054 , 0.8894 , 0.8704 , 0.8481
116  , 0.8221 ,
117                               0.7922 , 0.7583 , 0.7205 , 0.6791
118  , 0.6346 ,
119                               0.5877 , 0.5393 , 0.4900 , 0.4407
120  , 0.3922 ,
121                               0.3450 , 0.2996 , 0.2564 , 0.2156
122  , 0.1773 ,
123                               0.1417 , 0.1086 , 0.0755 , 0.0475
124  , 0.0224 ,
125                               0.0000,
126  /
127
128  &physics
129  mp_physics                   = 9,     9,     9,
130  ra_lw_physics               = 1,     1,     1,
131  ra_sw_physics               = 1,     1,     1,
132  radt                        = 10,    10,    10,
133  sf_sfclay_physics           = 1,     1,     1,
134  sf_surface_physics          = 2,     2,     2,
135  bl_pbl_physics              = 5,     5,     5,

```

```

136  bldt                = 0,      0,      0,
137  cu_physics          = 1,      0,      0,
138  cudt                = 5,
139  isfflx              = 1,
140  ifsnow              = 1,
141  icloud              = 1,
142  surface_input_source = 3,
143  num_soil_layers     = 4,
144  num_land_cat        = 21,
145  sf_urban_physics    = 0,      0,      0,
146  bl_mynn_tkebudget   = 1,      1,      1,
147  bl_mynn_tkeadvect   = .true., .true., .true.,
148  rdmaxalb            = .false.,
149  sst_update          = 1,
150  tmn_update          = 1,
151  usemonalb           = .true.,
152  lagday              = 150,
153  sst_skin            = 1,
154  slope_rad           = 1,  1,  1,
155  prec_acc_dt         = 60., 10., 10.,
156  fractional_seaice   = 1,
157  seaice_threshold    = 0.,
158  /
159
160  &noah_mp
161  dveg                = 4,
162  opt_crs              = 1,
163  opt_btr              = 2,
164  opt_run              = 3,
165  opt_sfc              = 1,
166  opt_frz              = 1,
167  opt_inf              = 1,
168  opt_rad              = 3,
169  opt_alb              = 2,
170  opt_snf              = 4,
171  opt_tbot             = 1,
172  opt_stc              = 3,
173  /
174
175  &dynamics
176  w_damping            = 1,
177  diff_opt             = 1,      1,      1,
178  km_opt               = 4,      4,      4,
179  diff_6th_opt        = 0,      0,      0,
180  diff_6th_factor     = 0.12,  0.12,  0.12,
181  base_temp            = 290.
182  damp_opt             = 0,
183  zdamp                = 5000., 5000., 5000.,
184  dampcoef             = 0.01,  0.01,  0.01,
185  khdif                = 0,      0,
186  kvdif                = 0,      0,
187  non_hydrostatic     = .true., .true., .true.,

```

```
188 /
189
190 &bdy_control
191 spec_bdy_width           = 5,
192 spec_zone                = 1,
193 relax_zone               = 4,
194 spec_exp                 = 0.13
195 specified                 = .true., .false., .false.,
196 nested                   = .false., .true., .true.,
197 /
198
199 &grib2
200 /
201
202 &namelist_quilt
203 nio_tasks_per_group = 0,
204 nio_groups = 1,
205 /
206
```
